# Supplementary material for: Colorimetric Quantification for Residual Poly- DADMAC in Water Treatment
Source: Preprints.org preprint supplement (doi:10.20944/preprints202308.1663.v1), 2023-08-24
Supplement: Supplementary file 2 [file supplementary]

Archive with 1 entries (1 files):
- PD quant Supplementary Material.pdf
